# Supplementary material for: In Silico Discovery of Natural and Synthetic Inhibitors Targeting AKT1 in Prostate Cancer
Source: Research Square preprint supplement (doi:10.21203/rs.3.rs-7627265/v1), 2025-09-26
Supplement: Supplementary file 1 [file 5773f28cba59dc2f662b6129.docx]

Supporting Figures


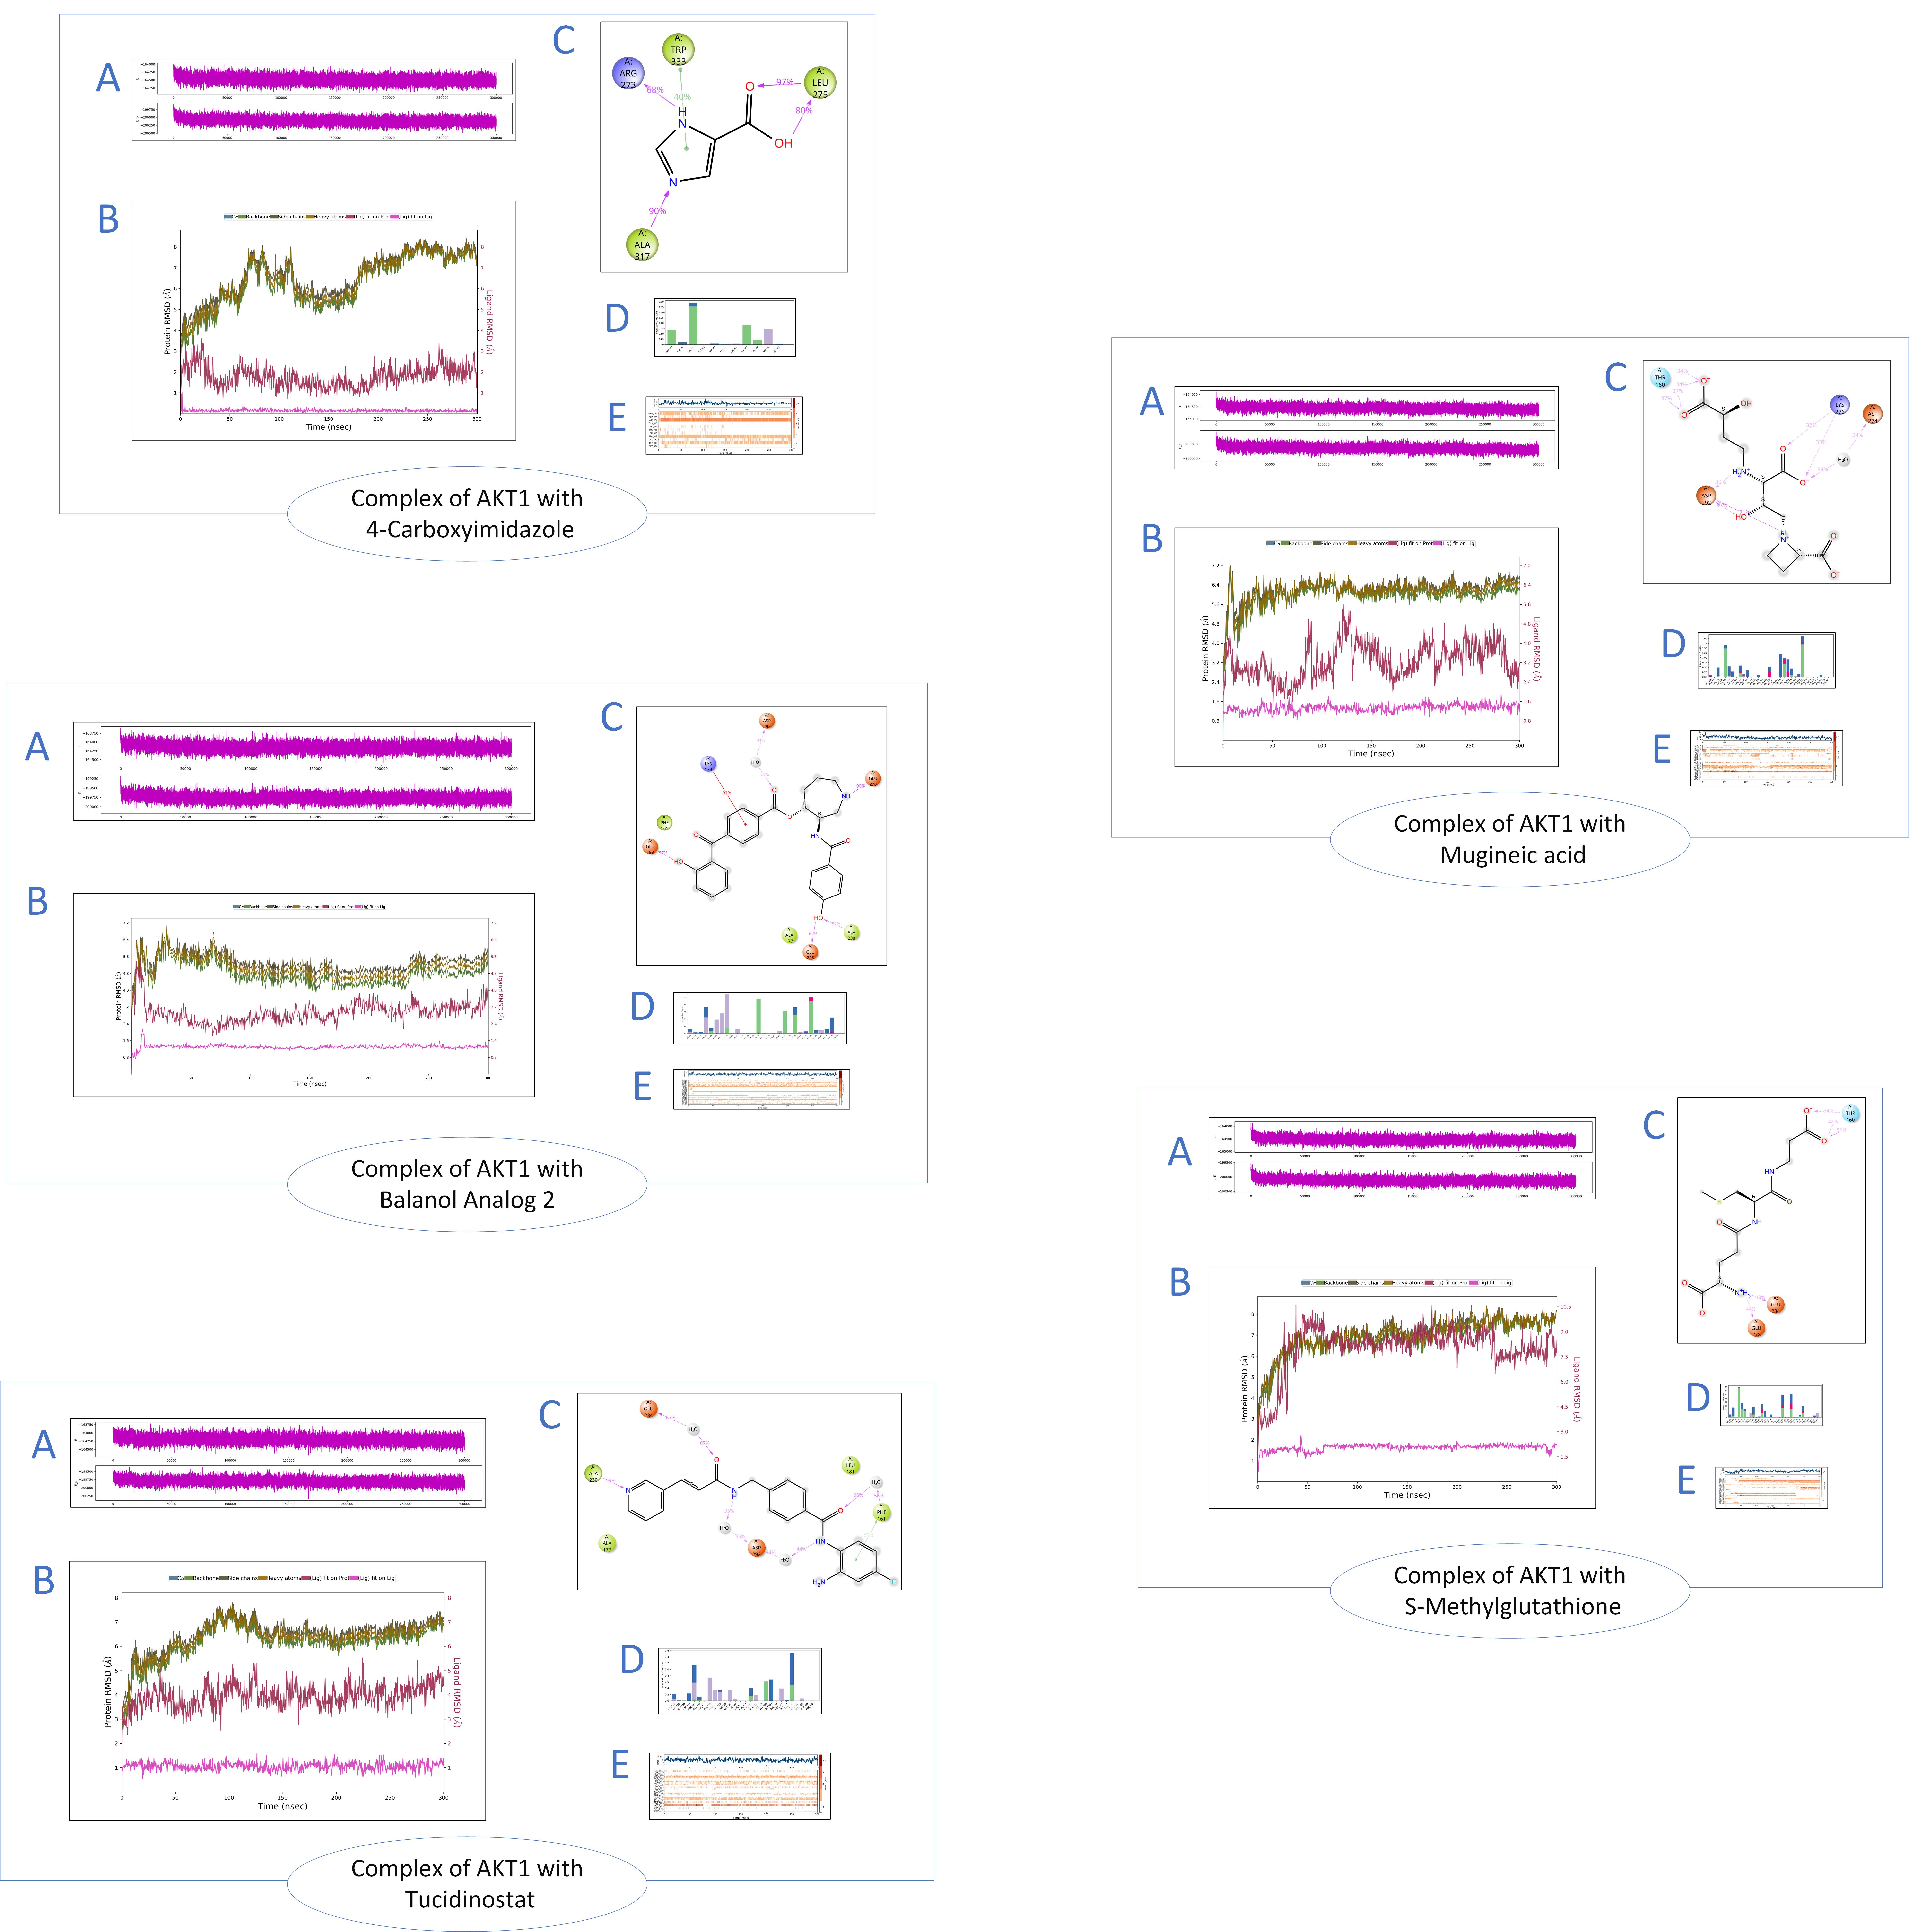


**Figure 1** Energy plot, RMSD, and Interactions plots for complexes of AKT1 with different ligands during MD simulation


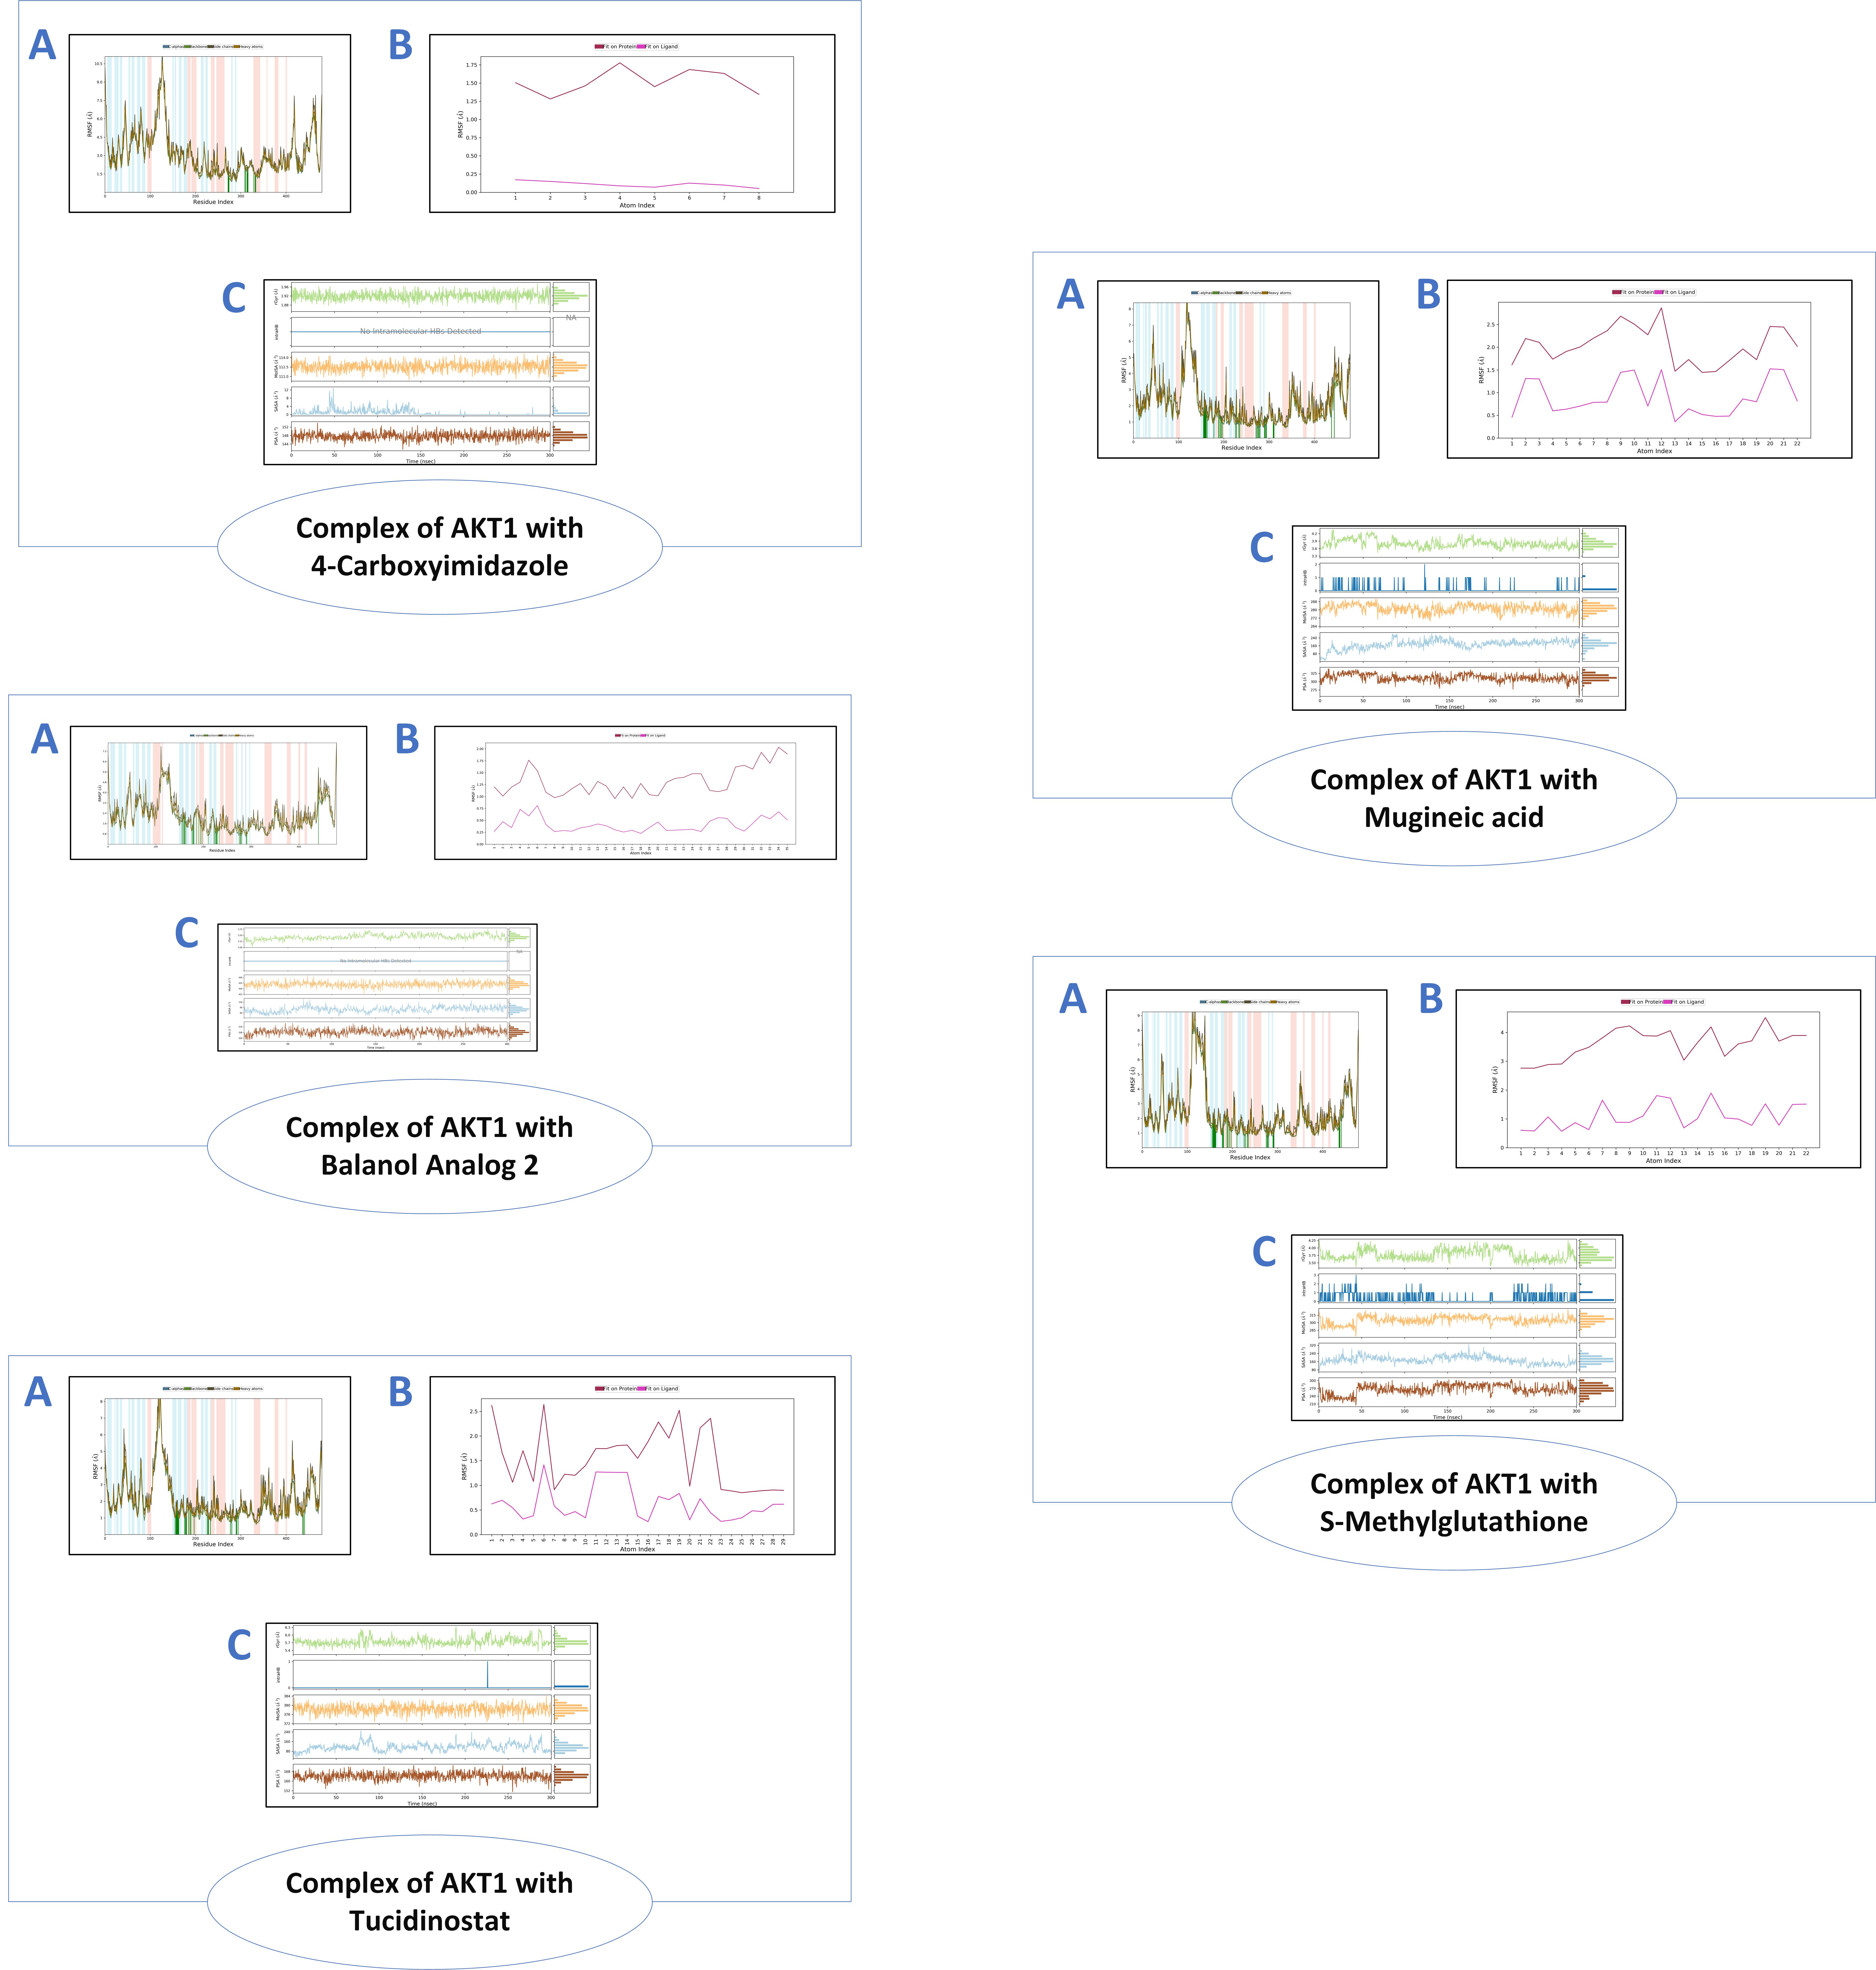


**Figure 2** RMSF, and Ligand properties plots for complexes of AKT1 with different ligands during MD simulation
